# Supplementary material
Source: PubMed Central journal article supplement (PMC3165086)

## **Supplementary Figure Legends**

**Supplementary Figure 1** CXCR3 promotes DMBA/TPA tumorigenesis but has no role in MCA primary tumorigenesis or in rejection of RAG regressor transplantable fibrosarcomas. (A) Separate experiments from those in Figure 1 show decreased DMBA/TPA tumor development in CXCR3<sup>-/-</sup> female mice compared to WT females (\*\*p<0.001, n=14 for CXCR3<sup>-/-</sup> (filled squares) and n=12 for WT females (filled triangles) and (B) in an independent experiment with CXCR3<sup>-/-</sup> male and WT male mice (\*\*p<0.001, n=15 for CXCR3<sup>-/-</sup> and n=13 for WT males). Note the difference between WT and CXCR3<sup>-/-</sup> mice is more robust for males than females. In addition, the experiments in A and B were performed independently and in experiments where male and female cohorts were used concurrently, no significant difference in tumor development between CXCR3<sup>-/-</sup> male and female mice was noted (data not shown). (C) MCA tumorigenesis at 6.25 µg dose shows no difference between CXCR3<sup>-/-</sup> and WT mice (n.s.= not significant, n=33 for CXCR3<sup>-/-</sup> and n=30 for WT). (D) CXCR3 is not required for the rejection of a majority of RAG regressor tumors (note, data shown for 7/21 tumors). Twenty-one immunogenic RAG regressor tumors, which grow progressively in RAG2<sup>-/-</sup> mice and are rejected in WT mice, were transplanted into the flanks of the indicated mice and monitored for tumor growth (1 X 10<sup>6</sup> cells/mouse, n=2 for RAG2<sup>-/-</sup>, n=4-5 for WT and CXCR3<sup>-/-</sup> mice). The d42m1 tumor is the only one that grows in RAG2<sup>-/-</sup> and CXCR3<sup>-/-</sup> mice whereas it is rejected in WT mice. Twenty other tumor cell lines tested rejected in both WT and CXCR3<sup>-/-</sup> mice and grew in RAG2<sup>-/-</sup> mice (tumor cell lines F535, F510, d27m2, H31m1, F515 and d30m4 are shown).

**Supplementary Figure 2** Reconstitution of CXCR3<sup>-/-</sup> mice with WT fetal liver cells restores T and NK cell CXCR3 expression to WT levels. Recipient mice were radiated, adoptively transferred with either WT or CXCR3<sup>-/-</sup> fetal liver cells and were then rested for 12 weeks. FACS analysis of splenocytes at the end of experiments, with the indicated gating first either on CD8<sup>+</sup> or CD4<sup>+</sup>, revealed CXCR3 expression in the T cell, CD44<sup>+</sup> population of WT mice (compare A to B and G to H). All recipients that received WT cells had similar CXCR3 expression (includes C, D and E for CD8<sup>+</sup> T cells and I, J and K for CD4<sup>+</sup> T cells). As expected, RAG2<sup>-/-</sup> mice that received CXCR3<sup>-/-</sup> cells had no CXCR3 expression (F and L). RAG2<sup>-/-</sup> mice were used as

recipients instead of WT mice to avoid any contribution of radio resistant CXCR3 expressing B or T cells. Note that splenocyte counts were similar in all mice (data not shown) and these plots are representative of all mice examined (numbers of mice in Figure 4 legend).

Supplementary Figure 3 FACS analysis of DMBA/TPA treated skin revealed no differences in CXCR3<sup>-/-</sup> compared to WT mice for CD11b<sup>+</sup> cells, Gr1<sup>+</sup>CD11b<sup>+</sup> cells and  $\gamma\delta/\nu\gamma 5^+$  cells. Epidermal preparations were generated from untreated WT and CXCR3<sup>-/-</sup> mice or short course DMBA/TPA treated skin (designated as D/T) and FACS analysis was performed for CD11b<sup>+</sup> cells, Gr1<sup>+</sup>CD11b<sup>+</sup> cells and  $\gamma\delta/\nu\gamma 5^+$  cells. Each point represents an individual mouse and data are expressed as percentage of cells relative to total CD45<sup>+</sup>/PI<sup>-</sup> cells and revealed no significant reductions.

### A. DMBA/TPA- females

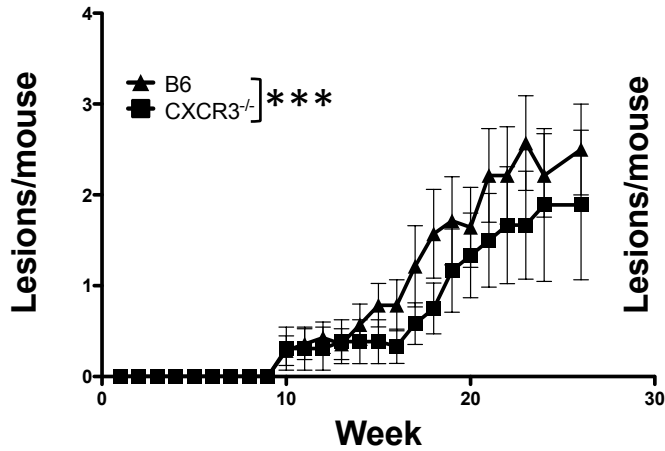

### B. DMBA/TPA- males

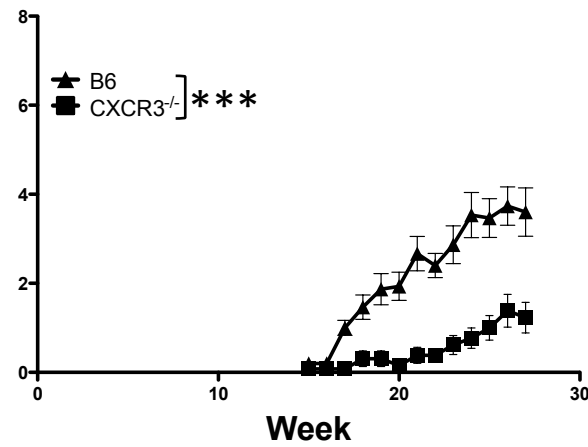

### C. MCA- 6.25 μg

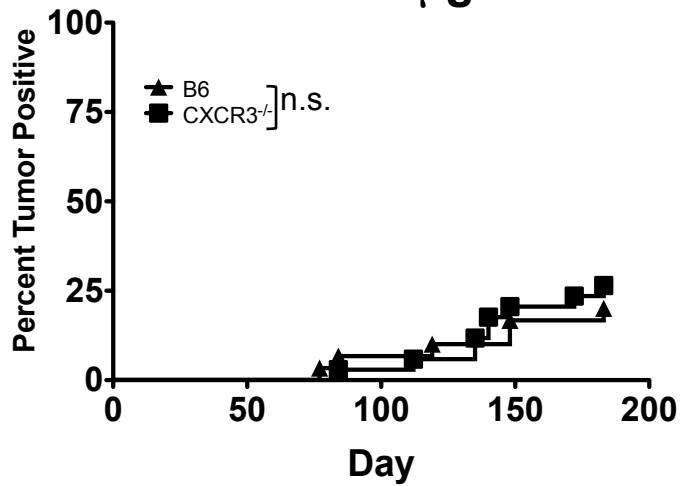

### D. Tumor Transplants

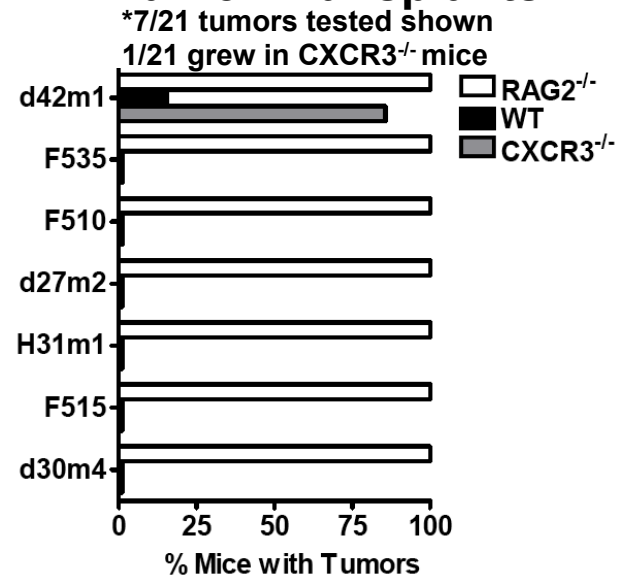

## Gated first on CD8<sup>+</sup> cells

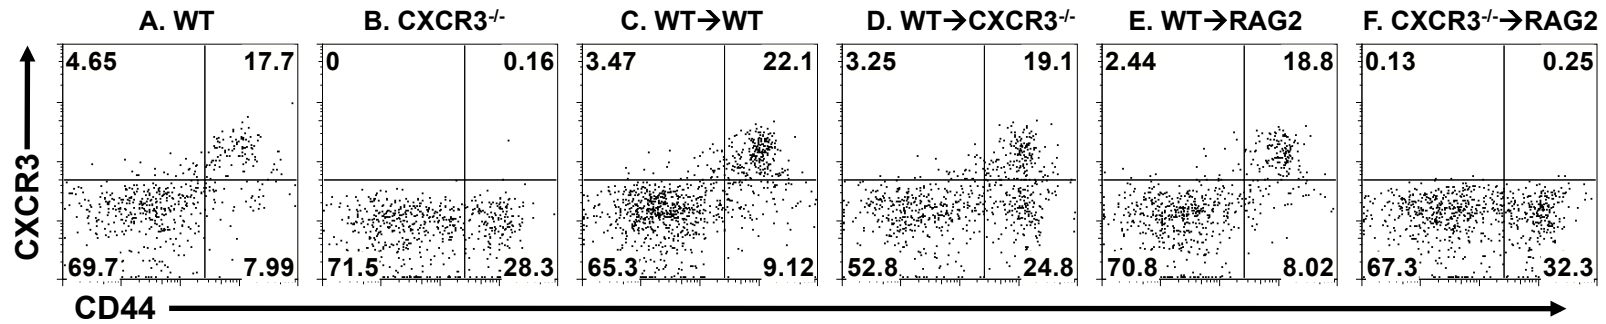

## Gated first on CD4<sup>+</sup> cells

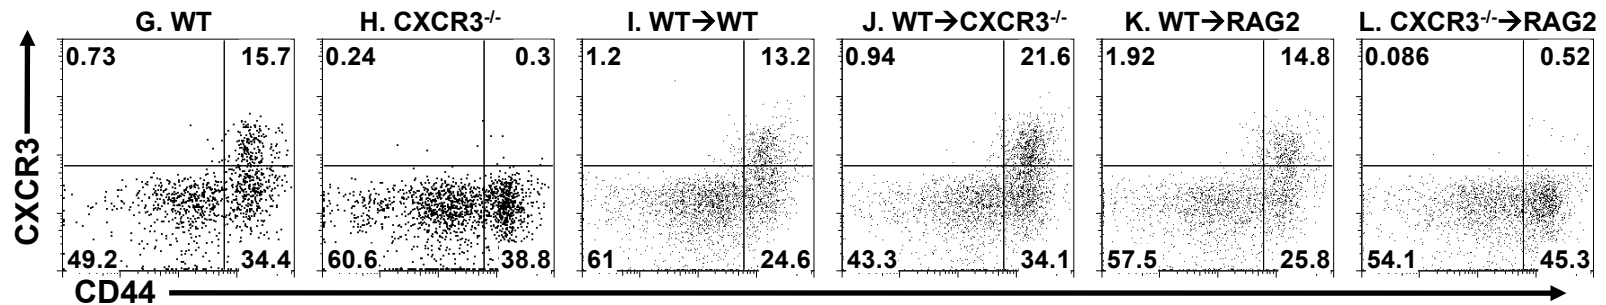

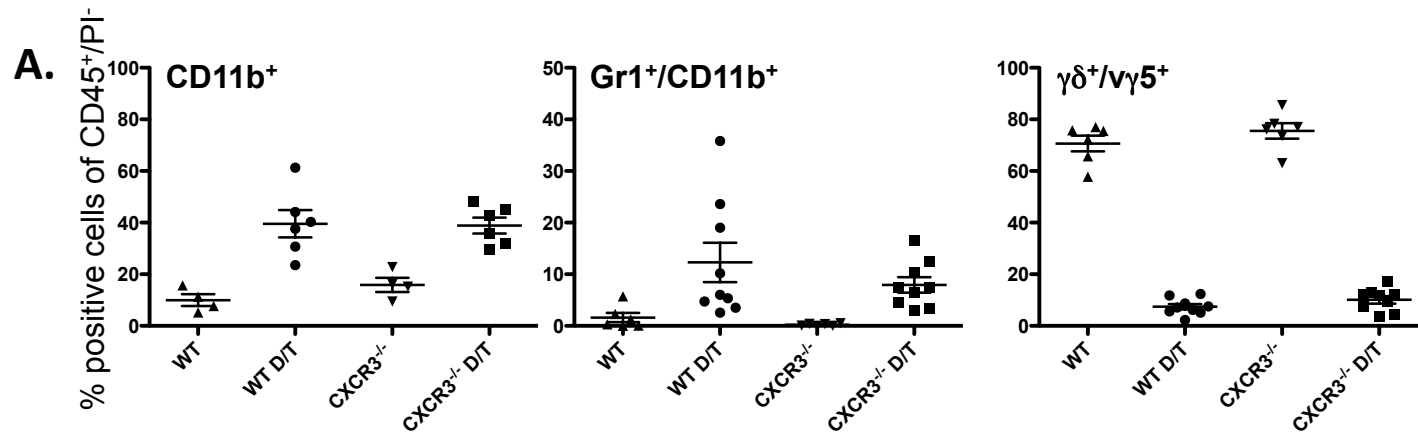

Supplement: NIHMS310887-supplement-1.pdf [file NIHMS310887-supplement-1.pdf]
